# Supplementary material for: Recrystallization of single crystal CsCu2I3 perovskites by I2 treatment for enhanced UV detecting abilities
Source: Royal Society of Chemistry journal article supplement (doi:10.1039/d4tc04849k), 2025-01-01
Supplement: d4tc04849k1.pdf [file d4tc04849k1.pdf]

## Supporting information

### Recrystallization of single crystal $\text{CsCu}_2\text{I}_3$ perovskite by $\text{I}_2$ treating for enhanced UV detecting abilities

Fa Cao<sup>1\*</sup>, Guanyu Cheng<sup>1</sup>, Enliu Hong<sup>2</sup>, Ying Liu<sup>1</sup>, Sancan Han<sup>3</sup>, Pingping Yu<sup>\*4</sup>, Bin Sun<sup>1\*</sup>

1. State Key Laboratory of Organic Electronics and Information Displays, Institute of Advanced Materials (IAM), School of Materials Science and Engineering, Nanjing University of Posts and Telecommunication (NJUPT), Nanjing 210023, P. R. China

2. Department of Materials Science, State Key Laboratory of Molecular Engineering of Polymers, Fudan University, Shanghai 200433, P. R. China

3. School of Opto-electronic and Computer Engineering, University of Shanghai for Science and Technology, Shanghai 200093, P. R. China

4. School of Integrated Circuits, Jiangnan University, Wuxi 214122, P. R. China.

Corresponding author: [iamfcao@njupt.edu.cn](mailto:iamfcao@njupt.edu.cn) (F. Cao), [pingpingyu@jiangnan.edu.cn](mailto:pingpingyu@jiangnan.edu.cn) (P. P. Yu), [iambsun@njupt.edu.cn](mailto:iambsun@njupt.edu.cn) (B. Sun).

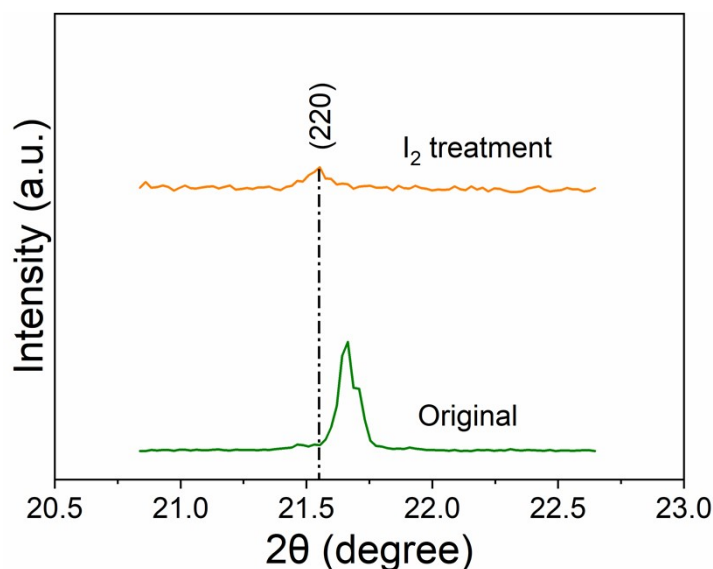

**Figure S1** Enlarged (220) xrd peaks of  $\text{CClI}_2\text{I}_3$  before and after  $\text{I}_2$  treatment.

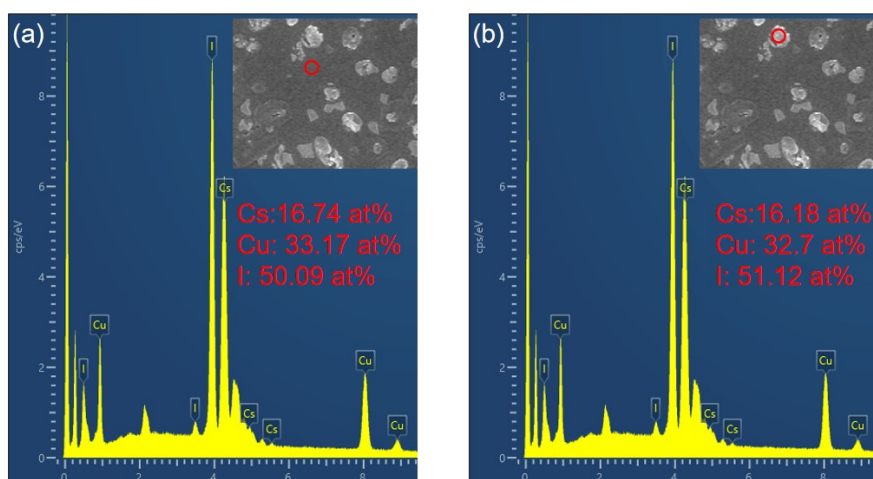

**Figure S2** a) and b) point EDS analysis of the surface on and beside the nanoparticles, respectively.

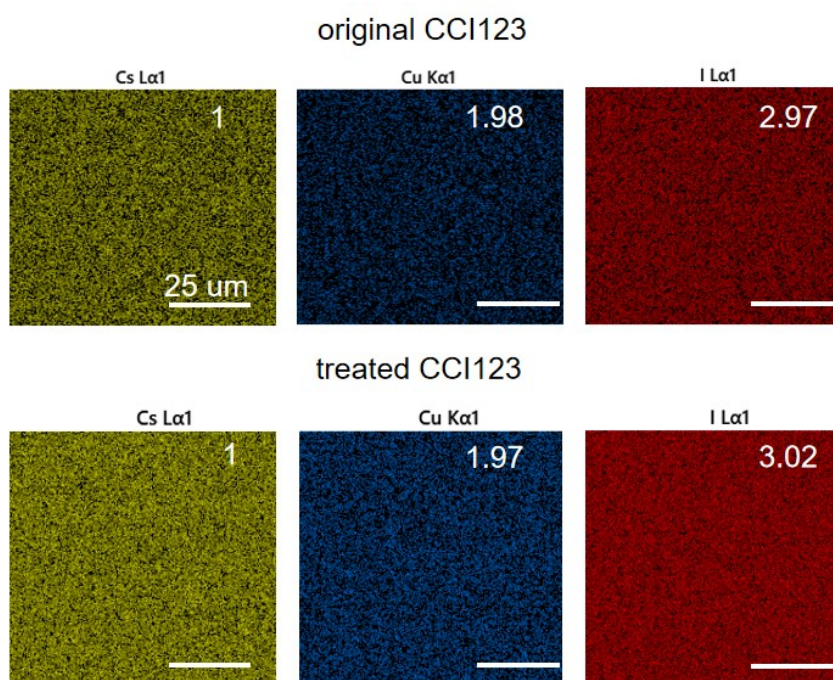

**Figure S3** EDS mapping of original and  $I_2$  treated CCI123 microwires.

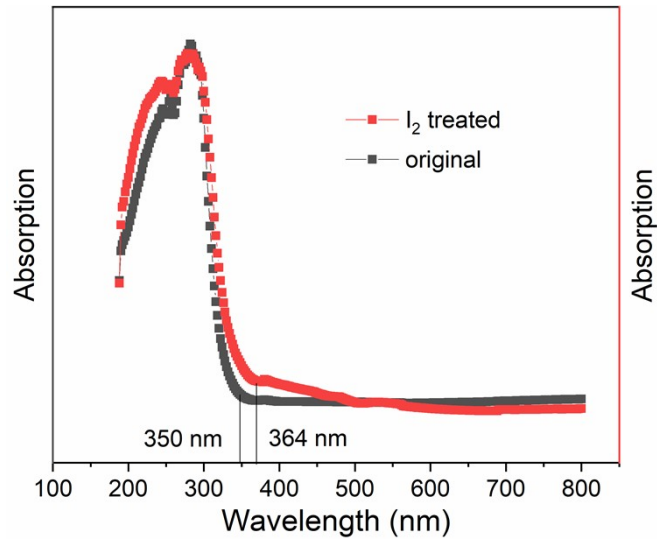

**Figure S4** UV-vis spectra of CCI123 before and after I<sub>2</sub> treatment.

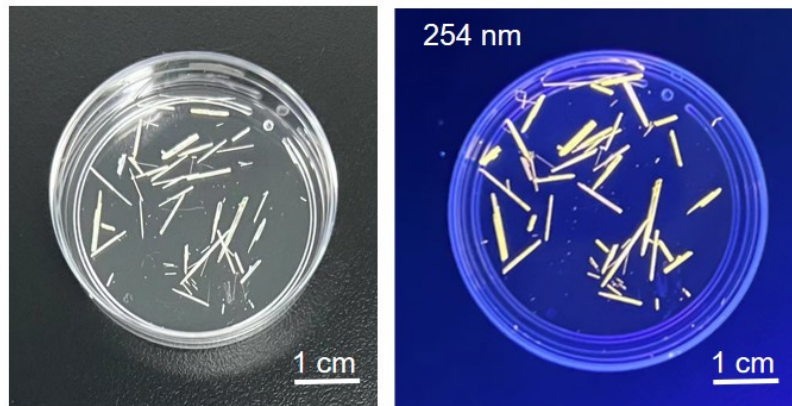

**Figure S5** Optical image of CCI123 microwires under day light and 254 nm UV light excitation.

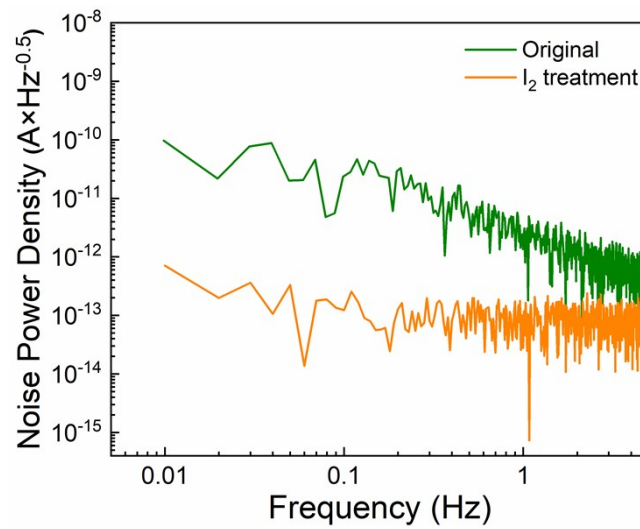

**Figure S6** Noise power spectrum of original CCI123 and I<sub>2</sub> treated CCI123 microwires.

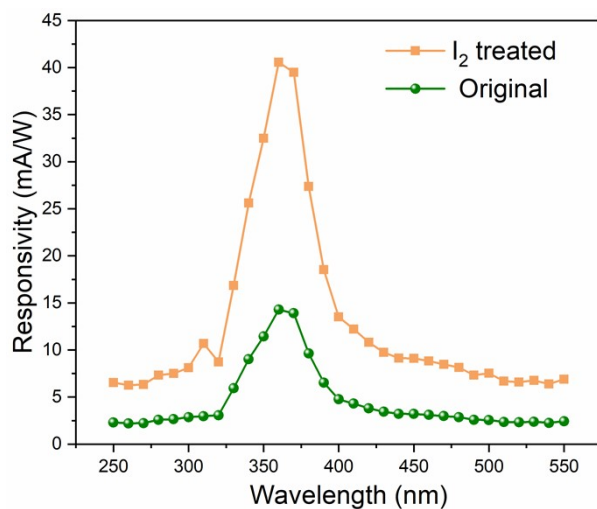

**Figure S7** The responsivity spectrum of original and I<sub>2</sub> treated CCI123, respectively.

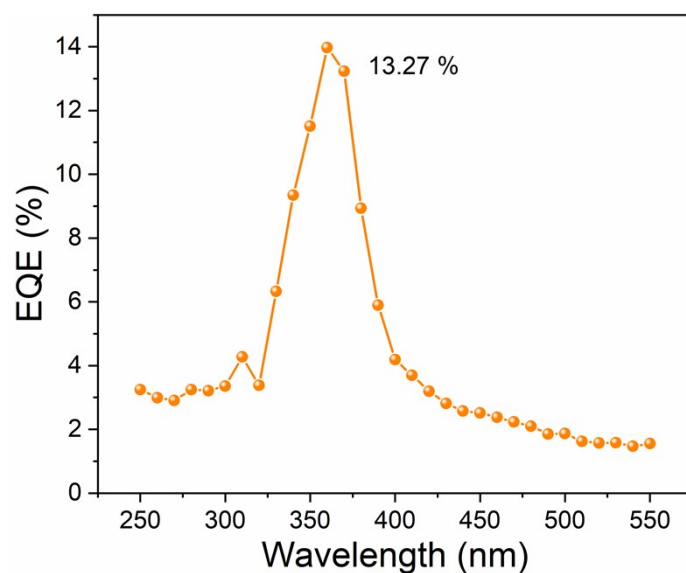

**Figure S8** EQE spectrum of the I<sub>2</sub> treated CCI123.
